# Supplementary material for: Meta-analysis in periprosthetic joint infection: a global bibliometric analysis
Source: PubMed Central journal article supplement (PMC7350679; doi:10.1186/s13018-020-01757-9), 2020-07-10
Supplement: 13018_2020_1757_MOESM1_ESM.pdf [file 13018_2020_1757_MOESM1_ESM.pdf]

---

**PJI-related keywords (196)**

---

Adhesins;ankle;arthroplast\*;arthroplastic;arthroplasties;arthroplasty;aseptic loosening;aseptic loosening of joint prosthesis;bacteraem\*;bacterem\*;Bacteria;bacteria infection;bacteria infections;bacteria\*;Bacterial Adhesion;bacterial infections;bacterie;biofilm\*;Biofilms;complication;deep infection;deep prosthetic infection;deep surgical site infection;ELBOW;endoprotheses;endoprosthesis;endoprosthetic;failed;failed total joint arthroplasty;femoral;Femur;femur\*;finger;graft;HA;hemiarthroplasty;Hip;Hip arthroplastic;Hip arthroplasties;Hip arthroplasty;Hip implant;Hip implants;Hip infection;hip joint;Hip joint replacement;Hip joint replacements;Hip operation;Hip prostheses;Hip Prosthesis;hip replacement;Hip replacements;HSA;Implant infection;implant\*;Implantation;Implantations;Implants;infect;infect\*;infected;infected hip prostheses;infected knee prostheses;infected total knee arthroplasty;infection;infection\*;infections;infectious;infective;inflamed;inflammat\*;inflammation;inflammation\*;joint;joint arthroplasty;joint infection;joint prostheses;joint prosthesis;Joint Prosthesis Implantation;Joint prosthesis implantations;joint prosthesis infection;joint replacement;joint replacements;knee;knee arthroplast\*;Knee arthroplastic;knee arthroplasty;knee infection;knee joint;knee prosthesis;Knee reconstruction;knee replacement;knee replacement\*;Knee replacements;knee revision failure;knee revision infection;knee surgery;metal-on-metal;Metal-on-Metal Joint Prostheses;operative;"operative surgical procedures;"orthopaedic implant infection;orthopaedics;orthopedic;orthopedics;peri implant infection;peri prosthetic joint infection;periprosthetic; periprosthetic hip infection;periprosthetic infection;peri-prosthetic infection;periprosthetic infections;periprosthetic joint infection;Peri-prosthetic joint infection;periprosthetic joint infections;peri-prosthetic joint infections;periprosthetic knee infection;PJI;PJIs;postoperative;postoperative post-operative;PPI;primary knee infection;primary TKA infection;prosthe\*;prostheses;Prostheses and Implants;prosthesis;Prosthesis Implantation;Prosthesis Implantations;prosthesis infection;prosthesis infections;Prosthesis Related Infections;prosthesis-related;Prosthesis-related infection;prosthesis-related infection\*;prosthesis-related infections;prosthetic;Prosthetic hip infection;prosthetic infection;prosthetic joint infection;prosthetic joint infections;replac\*;Replaced hip;replacement;Replacement Arthroplasties;Replacement Arthroplasty;replacements;resection arthroplasty;reverse total shoulder arthroplasty;revision;revision arthroplasty;revision TKA infection;revision total hip arthroplasty;revision total hip replacement;RTSA;sepsi\*;Sepsis;sepsis in revision total joint arthroplasty;septi\*;Septic;septic loosening;septically;Shoulder;shoulder arthroplasty;shoulder replacement;specific joint-associated procedures;SSI;surgery;surgical infection;surgical procedures operative;surgical site infection;Surgical Wound Dehiscence;Surgical Wound Infection;THA;THR;Tibia;tibia\*;TJA;TKA;TKR;total hip;Total hip arthroplasty;total hip prosthesis;total hip replacement;total hip replacement;total joint;Total Joint Arthroplasty;total joint replacement;Total joint replacements;total knee arthroplasty;Total Knee Prosthesis;total knee replacement;total shoulder arthroplasty;traumatology;TSA;wound;Wound Infection

---

**Diagnose (179)**

---

---

111in;16S amplicon targeted sequencing;18F;18FDG;2deoxyglucose;2-fluoro-2-deoxy-D-glucose;99m;99mtc;99mTc-HDP;99mTc-hydroxymethane diphosphonate;99mTc-MDP;99mTc-methylene diphosphonate;a-defensin;alfa-defensin;alpha defensin;a-lpha Defensins;alpha-defensin;Alpha-Defensins;antigranulocyte scintigraphy;anti-granulocyte scintigraphy;antimicrobial peptide;Antimicrobial Peptides;arthrograph\*;aspirate;aspiration;beta-Defensins;biomarker\*;blood culture bottles;blood culture system;blood culture vials;bone;BW 250/183;chemical shift;compute\*;C-reactive;C-Reactive Protein;CRP;CT;CTs;defensin;Defensins;Deoxyglucose;deoxy-glucose;diagnose;diagnosing;diagnosis;diagnosis of prosthetic joint infection;diagnostic;diagnostic test;echograph\*;echotomograph\*;electron beam;Emission-Computed;F-18DG;Fab;FDG;fine needle aspiration;fluid;fluorin\*;fluoro;Fluorodeoxyglucose;Fluorodeoxyglucose F18;fluoroscop\*;fMRI\*;frozen section analysis;frozen section biopsy;Gamma Camera Imag\*;genetic diagnosis;genomics;gram;histological evaluation;histology;histopathology;IL-6;imag\*;image;image subtraction\*;images;imaging;in-111;indium;inflammatory;inflammatory markers;interleukin;interleukin-6;intra-articular;intraoperative frozen section;intraoperative;joint aspiration;lateral flow test;LE;leucocyte;leukocyte esterase;leukocyte esterase;leukocyte scintigraphy;Leukoscan;magnetic resonance;Magnetic Resonance Imaging;Magnetic Resonance Spectroscopy;Magnetisation\*;Magnetization\*;marker\*;metagenomic sequencing;monoclonal antibodies;monoclonal antibody;MR imag\*;MRI\*;Neutrophil;Neutrophil Antimicrobial;neutrophil antimicrobial peptide;Neutrophil Antimicrobial Peptides;next generation sequencing;NGS;NMR\*;pathology of joint tissues;PCR;PCT;peptide neutrophil antimicrobial;Peptides;periprosthetic tissue;PET;PMN;polymerase chain reaction;polymorphonuclear;positron emission tomography;positron-emission tomography;presence of polymorphonuclear leukocytes;procalcitonin;protein;radiograph\*;Radiography;radioisotop\*;radionuclid\*;radionuclide imaging;Radiopharmaceuticals;rentgen\*;rontgen\*;scan;scintigraph\*;scintigraphy;scintiphograph\*;scintiscan\*;sensitivity;septic;septica;serum;shotgun metagenomics;sonicate;sonicate fluid;sonication;sonication fluid;sonograph\*;specificity;stain;sulesomab;synovasure;synovial;synovial fluid;synovial fluid count;test;three-phase;tissue;Tomodensitometr\*;tomograph\*;Tomography;triple-phase;ultrason\*;ultrasonicate;ultrasonography;ultrasound;WBC-scintigraphy;white cell;white cell count;x-radiograph\*;X-Ray Computed;x ray\*;x-ray\*;zeugmatograph\*;Zonograph\*

---

### **Outcome (60)**

1-stage;2 stage;2-stage;antibiotic bone cement spacer;arthrodes;ARTHRODESIS;articulating spacer;bone cement;bone cements;cemented;cementless;culture;Culture negative;debridement;delayed reimplantation;direct exchange;direct-exchange;exchange;Exchange arthroplasty;external;fixation;Fixator;Fusion;hybrid;Ilizarov;implant retention;Nail;nail\*;negative pressure;one- and two stage revision surgeries;one stage;one-stage;one-stage revision;prosthesis exchange;reimplant\$;reimplantation;RE OPERATION;Replantation;reverse hybrid;revis\$;revision;revision arthroplasty;rotator cuff;simultaneous;single stage;single-stage;spacer;Spacers;stage reimplantation;staged;staged reimplantation;staged revision;static Spacer;treatment outcome;two stage;two-stage;two-stage revision;uncemented;unilateral;wound

---

---

**Prevention (82)**

---

antibiotic cement;1 stage knee revision;2 stage knee revision;Air conditioning;Alcohol; cement;anti infective;anti infective agents;antibacterial agent;antibacterial agents;Anti-Bacterial Agents;antibacterial\*;antibiotic bone cement;antibiotic impregnated;antibiotic prophylactic;antibiotic prophylaxis;antibiotic\*;antibiotic-impregnated bone cement;antibiotic-impregnated cement;Antibiotic-laden Cement;antibiotic loaded bone cement;antibiotic-loaded bone cement;Antibiotic-loaded Cement;anti-infective agent;Anti-Infective Agents;antimicrobial;antimicrobial\*;antimycobacterial agent;antimycobacterial agents;antiseptic\*;Aztreonam;bone cement;bone cements;cefazolin;cefepime;cefuroxime;cement;cephalosporins;chloraprep;chlorhexidine;chlorhexidine-alcohol;chlorhexidineisopropyl;Ciprofloxacin;control;Controlled;conventional operating room;conventional operating theatre;decolonization;Environment;gentamicin;infection control;infection prevent\*;infused bone cement;intravenous antibiotics;Iodophors;laden;laminar air flow;laminar air flow system;laminar airflow;levaquin;linezolid;nasal decolonization;Ofloxacin;operating rooms;Operating theatre;Oxazolidinones;Povidone-Iodine;prevention;prevention and control;procedures;randomized controlled trial;surgical;surgical antimicrobial prophylaxis orthopedic;systemic antibiotics;tobramycin;Trimethoprim-Sulfamethoxazole Combination;Turbulent air flow;ultra clean air;ultra-clean air;ultra-clean air system;Vancomycin;ventilation

---

**Risk factor (74)**

---

2 staged;2-stage;acquired immune deficiency syndrome;AIDS;albumin;anesthesia;Articulating surface;ASB;asymptomatic bacteriuria;asymptomatic leukocyturia;bacteriuria;Bearing couples;Bearing surface;BMI;body mass index;Ceramic;China;cigar;cigarette;cigarettes;cigars;Cobaltchrome;comorbidity;culture;determinant;Diabetes mellitus;exchange;factor;gene;general anesthesia;genetic;Glycemic control;HbA1c;Hemoglobin A1C;hemophilia;HIV;human immunodeficiency virus;hyperglycemia;hypoalbuminemia;inject;Injection;intra-articular;malnutrition;Metal-on-metal;microbiology;neuraxial anesthesia;Nicotine;nutritional status;obesity;organism;Polyethylene;polymorphism;predictor;reimplant;reimplantation;risk;risk factor;smoker;smokers;Smoking;SNP;steroid;tobacco;Tobacco Products;transfusion;two staged;two-stage;UHMWPE;urinalysis;urinary analysis;urinary tract infection;urine analysis;urologic diseases;UTI

---
